# Supplementary material for: Activation of the RIG-I/MAVS Signaling Pathway during Human Adenovirus Type 3 Infection Impairs the Pro-Inflammatory Response Induced by Secondary Infection with Staphylococcus aureus
Source: MDPI journal article supplement (doi:10.3390/ijms25084178), 2024-04-10
Supplement: s1 [file s1]

Supplementary Material

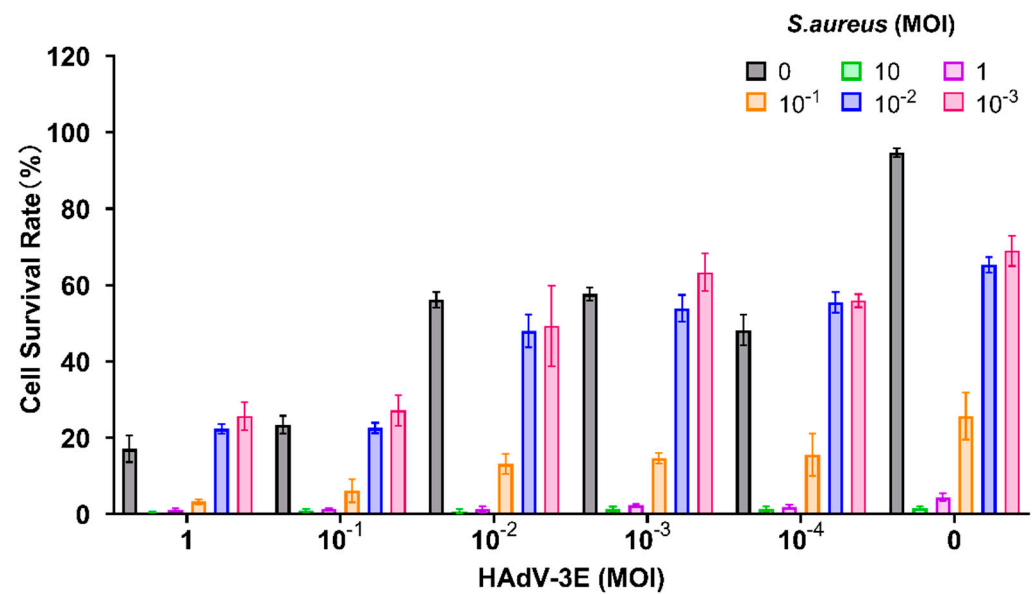

Supplementary Figures S1 Survival rate of A549 cells after infection with HAdV-3E at different MOI values for 48 hours and co-infection with *S. aureus* at different MOI values for 9 hours

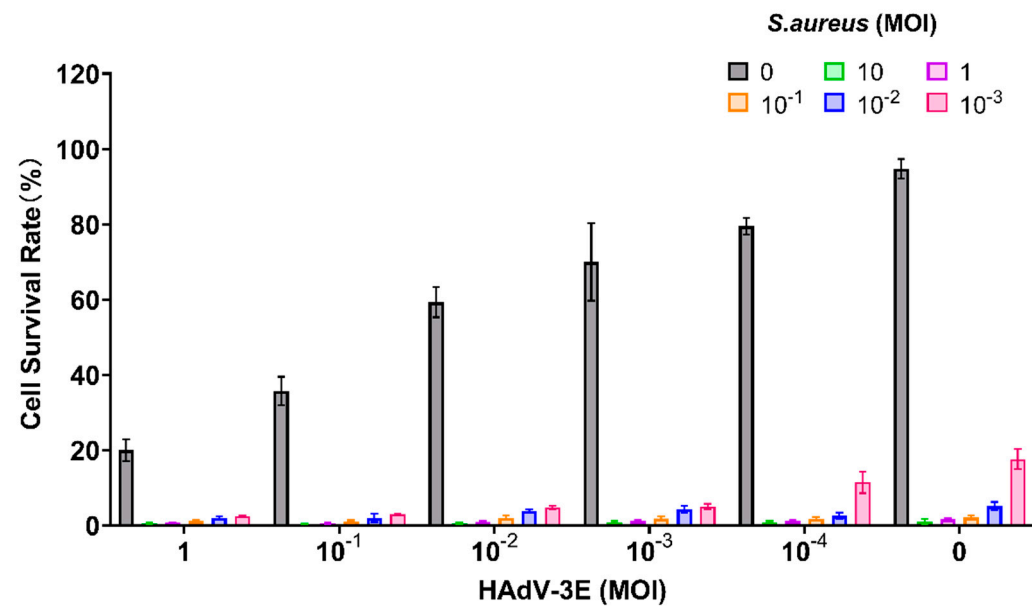

Supplementary Figures S2 Survival rate of A549 cells after infection with HAdV-3E at different MOI values for 48 hours and co-infection with *S. aureus* at different MOI values for 12 hours

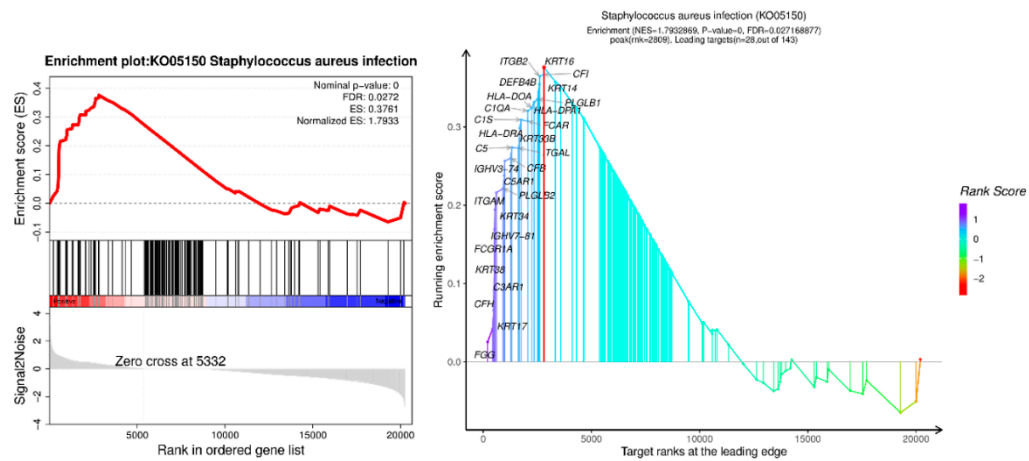

Supplementary Figures S3 A3SA\_48\_vs\_A3SA\_24 GSEA enrichment map of *Staphylococcus aureus* infection pathway

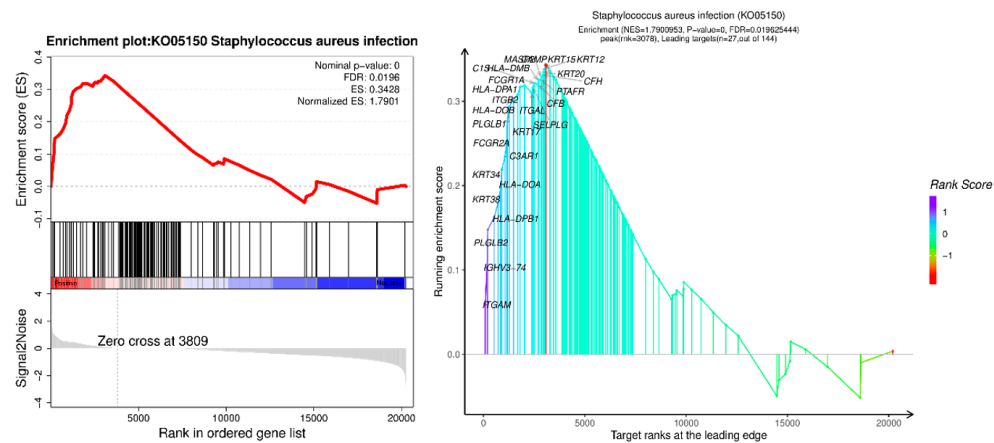

Supplementary Figures S4 A3SA\_36\_vs\_A3SA\_24 GSEA enrichment map of *Staphylococcus aureus* infection pathway

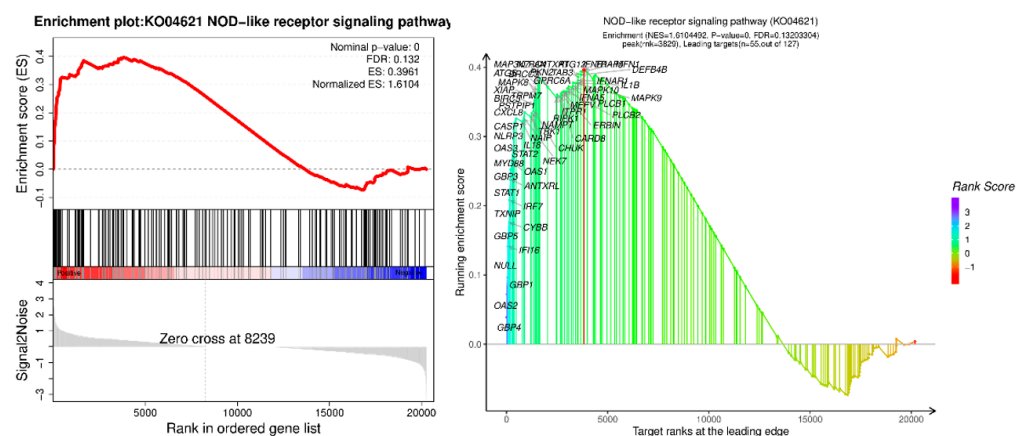

Supplementary Figures S5 A3SA\_48\_vs\_A3SA\_36 NOD-like receptor signaling pathway GSEA enrichment
